# Supplementary material
Source: PubMed Central journal article supplement (PMC3567280)
Supplement: mmc1.pdf [file mmc1.pdf]

AJHG, Volume 92

SUPPLEMENTAL DATA

## ***ALDH1A3* Mutations Cause Recessive Anophthalmia and Microphthalmia**

Lucas Fares-Taie, Sylvie Gerber, Nicolas Chassaing, Gill Clayton-Smith, Sylvain Hanein, Eduardo Silva, Margaux Serey, Valérie Serre, Xavier Gérard, Clarisse Baumann, Ghislaine Plessis, Bénédicte Demeer, Lionel Brétilon, Christine Bole, Patrick Nitschke, Arnold Munnich, Stanislas Lyonnet, Patrick Calvas, Josseline Kaplan, Nicola Ragge, and Jean-Michel Rozet

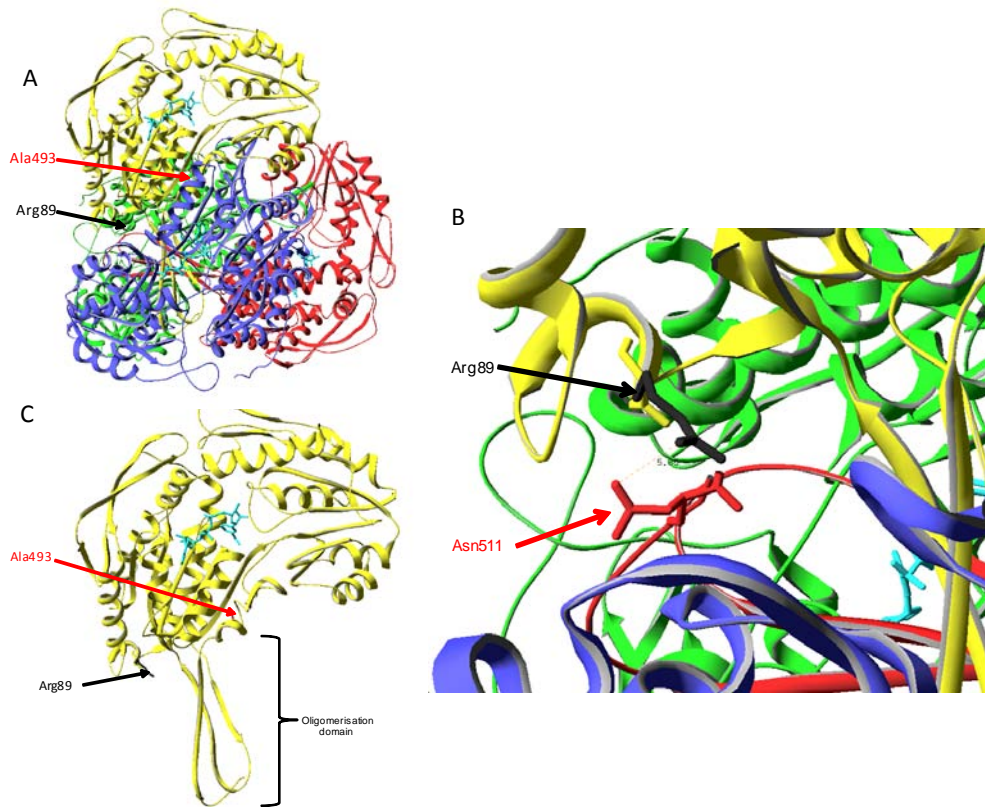

**Figure S1. Ribbon Representation of the Human ALDH1A3 Tetramer**

The 2.35 Å coordinate set for the tetrameric sheep liver class 1 aldehyde dehydrogenase with NAD bound (pdb code: 1BXS) was used as a template for modeling the human ALDH1A3 protein (71,3% sequence identity). (A) Each of the four monomers is shown in different colors (yellow, blue, green and red, respectively). The four catalytic pockets are visualized with the four NAD co-crystallized with the sheep ALDH1 (1BXS) and are shown in light blue. (B) Magnification of the region around the Arg89 residue of a monomer. The interaction with the Asn511 residue at a distance of 5 Å in another monomer is shown. The replacement of the Arg89 by a cysteine is predicted to alter the interaction between the monomers. (C) Ribbon representation of a monomer (yellow) bound to NAD (light blue) showing the oligomerization domain and the position of the two residues affected by A/M mutations. The p.Ala493Pro mutation is predicted to alter severely the oligomerization domain of the enzyme.

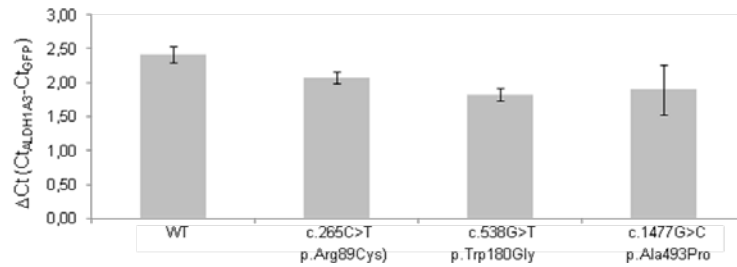

**Figure S2. Relative Expression of GFP and ALDH1A3 mRNA in HEK293 Cells Measured by RT-qPCR**

HEK293 cells were co-transfected with pCAG-GFP and pCMV6-Entry-ALDH1A3-WT-cMyc, pCMV6-Entry-ALDH1A3-Arg89Cys-cMyc, pCMV6-Entry-ALDH1A3-Trp180Gly-cMyc, pCMV6-Entry-ALDH1A3-Ala493Pro-cMyc plasmids, respectively. Total mRNA was extracted using the RNeasy Mini Kit (Qiagen, Courtaboeuf, France) according to manufacturer's protocol. cDNAs (5  $\mu$ l of a 1:25 dilution in nuclease-free water) were subjected to real-time PCR amplification in a buffer (20  $\mu$ l) containing MESA BLUE qPCR Master Mix Plus for Sybr Assay (Eurogentec, Angers, France) and 300 nmol/l of forward and reverse primers, on a Taqman 7900 HT Fast Real-Time PCR System (Applied Biosystems, Courtaboeuf, France). For each cDNA sample, the mean of cycle threshold (Ct) values was calculated from triplicates (SD <0.5 Ct). ALDH1A3 expression levels were normalized by using the relation  $\Delta$ Ct (Ct<sub>ALDH1A3</sub> - Ct<sub>GFP</sub>). Amplification efficiency was calculated for each primer-pair using fourfold serial dilution curves (1:5, 1:25, 1:125, 1:625). No reverse transcriptase and no template control reaction were used as negative controls in each run. The quantitative data are the means  $\pm$  SEM of three independent experiments. The graph shows that the expression of the wild-type and mutant *ALDH1A3* mRNAs are in the same range.

**A**

| Filter                                                                                             | sub    | del | ins | hom    | het    | Genes  |
|----------------------------------------------------------------------------------------------------|--------|-----|-----|--------|--------|--------|
| None                                                                                               | 47 594 | 197 | 199 | 20 268 | 27 722 | 16 634 |
| Heterozygote variants excluded                                                                     | 20 268 | 0   | 0   |        |        | 9897   |
| Variants with frequency $\geq$ 1% in dbSNP, EVS, 1000Genome excluded.                              | 834    | 0   | 0   |        |        | 689    |
| Variants in UTR, non-coding, intergenic and deep intronic regions and synonymous variants excluded | 223    | 0   | 0   |        |        | 174    |
| Polyphen and sift prediction beginn excluded                                                       | 28     | 0   | 0   |        |        | 27     |

**B**

| Gene           | chr       | Start            | End              | All      | sub      | ins      | del      | Coding   | Silent   | Splicing | Stop     |
|----------------|-----------|------------------|------------------|----------|----------|----------|----------|----------|----------|----------|----------|
| NBPF8          | 1         | 144593863        | 144622156        | 1        | 1        | 0        | 0        | 0        | 0        | 0        | 0        |
| OR2T35         | 1         | 248802088        | 248803059        | 1        | 1        | 0        | 0        | 1        | 0        | 0        | 0        |
| SLC25A22       | 11        | 790975           | 798816           | 1        | 1        | 0        | 0        | 1        | 0        | 0        | 0        |
| SORL1          | 11        | 121323412        | 121504887        | 1        | 1        | 0        | 0        | 1        | 0        | 0        | 0        |
| OR10G7         | 11        | 123909273        | 123910217        | 1        | 1        | 0        | 0        | 1        | 0        | 0        | 0        |
| MSANTD2        | 11        | 124636894        | 124671069        | 1        | 1        | 0        | 0        | 1        | 0        | 0        | 0        |
| ZFH2           | 14        | 23990569         | 24025901         | 1        | 1        | 0        | 0        | 1        | 0        | 0        | 0        |
| AHNAK2         | 14        | 105404081        | 105445194        | 1        | 1        | 0        | 0        | 1        | 0        | 0        | 0        |
| ITGA11         | 15        | 68594550         | 68725002         | 1        | 1        | 0        | 0        | 1        | 0        | 0        | 0        |
| <b>ALDH1A3</b> | <b>15</b> | <b>101402629</b> | <b>101457331</b> | <b>1</b> | <b>1</b> | <b>0</b> | <b>0</b> | <b>1</b> | <b>0</b> | <b>0</b> | <b>0</b> |
| CTB-134H23.2   | 16        | 29050423         | 29064547         | 1        | 1        | 0        | 0        | 1        | 0        | 0        | 0        |
| CLEC18B        | 16        | 74443029         | 74456149         | 1        | 1        | 0        | 0        | 1        | 0        | 0        | 0        |
| FASN           | 17        | 80036715         | 80056606         | 1        | 1        | 0        | 0        | 1        | 0        | 0        | 0        |
| TCEB3C         | 18        | 44555073         | 44556949         | 1        | 1        | 0        | 0        | 1        | 0        | 0        | 0        |
| HIF3A          | 19        | 46800803         | 46847190         | 1        | 1        | 0        | 0        | 1        | 0        | 0        | 0        |
| FUT2           | 19        | 49199728         | 49209707         | 1        | 1        | 0        | 0        | 1        | 0        | 0        | 0        |
| RGPD4          | 2         | 108443888        | 108507797        | 1        | 1        | 0        | 0        | 1        | 0        | 0        | 0        |
| PLEKHB2        | 2         | 131862920        | 132111782        | 1        | 1        | 0        | 0        | 1        | 0        | 0        | 0        |
| KRTAP10-6      | 21        | 46011649         | 46012886         | 1        | 1        | 0        | 0        | 1        | 0        | 0        | 0        |
| EIF4G1         | 3         | 184032783        | 184053646        | 1        | 1        | 0        | 0        | 1        | 0        | 0        | 0        |
| LEAP2          | 5         | 132208514        | 132211238        | 1        | 1        | 0        | 0        | 1        | 0        | 0        | 0        |
| PCDHB7         | 5         | 140552743        | 140556457        | 1        | 1        | 0        | 0        | 1        | 0        | 0        | 0        |
| CTAGE9         | 6         | 132030081        | 132032706        | 1        | 1        | 0        | 0        | 1        | 0        | 0        | 0        |
| TRGV9          | 7         | 38357118         | 38358962         | 1        | 1        | 0        | 0        | 1        | 0        | 0        | 0        |
| ZAN            | 7         | 100331749        | 100395919        | 1        | 1        | 0        | 0        | 1        | 0        | 0        | 0        |
| CPSF1          | 8         | 145618944        | 145635253        | 1        | 1        | 0        | 0        | 1        | 0        | 0        | 0        |
| PCSK5          | 9         | 78506060         | 78977755         | 1        | 1        | 0        | 0        | 1        | 0        | 0        | 0        |

**Table S1. Whole Exome Resequencing Summary.** (A) Filtering strategy of the variants resulting in selection of 28 substitutions in 27 genes. sub: substitution, del: deletion, ins: insertion, hom: homozygous, het: heterozygous, UTR: untranslated region. (B) Genes harboring nonsynonymous

homozygote variants predicted to be deleterious or with unknown effect using the Polyphen and SIFT programs. *ALDH1A3* is the only gene located in the 15q26.3 region. Chr: chromosome.

| Exon number | Forward sequence (5'-3') | Reverse sequence (5'-3') | Size of amplified product (bp) |
|-------------|--------------------------|--------------------------|--------------------------------|
| 1           | GAGCGGGCTGCGCAGTGT       | CCGAGACGTCCCGCGAAA       | 354                            |
| 2           | GGTGGACAAGATGGATAAGA     | GCCAGTTCTGTCTTATAGCT     | 299                            |
| 3           | CCAAACTGCAGTCACCTCAA     | CACGACCACACAAAACCAG      | 368                            |
| 4-5         | GGTGCATCTGACTGTGAG       | GCTTGTTCAACGCTGGTG       | 745                            |
| 6           | CCTCCACAAAGGCATCGTTG     | GCCACTGTCCCATCTCGT       | 392                            |
| 7           | GGATGAGAAGCCCAGGTC       | GCCTGTCAAAGGAAAAGCTC     | 376                            |
| 8           | GAGAGCCAGGTGGTGGCA       | GCACACATCTTACTCTCAGT     | 323                            |
| 9           | GCAGCTGTCACCAGTCCT       | GGGACCCTGTAGGCGGTT       | 348                            |
| 10          | GGCTTGACAAGAACATGCAG     | AAGGATTTCTGGGATCCCTG     | 371                            |
| 11-12       | GCTGAAGCAATGTTTGGACG     | GCAGATTGGAGCCTGTGTC      | 1611                           |
| 13          | CTCCAACGGCCTGATGGA       | CAGTAGATGTAAAGCCTCCAG    | 298                            |

**Table S2. Primers Used for Mutation Screening of *ALDH1A3*.**

| Oligonucleotides        | Sequence (5'-3')                                                    |
|-------------------------|---------------------------------------------------------------------|
| ALDH1A3-c.265T_forward  | GCCTTCCAGAGGGGCTCGCCATGG <u><b>T</b></u> GCCGGCTGGATGCCCTGAGTCGT    |
| ALDH1A3-c.265A_reverse  | CCCACGACTCAGGGCATCCAGCCGGC <u><b>A</b></u> CCATGGCGAGCCCTCTGGAA     |
| ALDH1A3-c.1477C_forward | GAAATGGCAGAGAACTAGGTGAATAC <u><b>C</b></u> CTTTGGCCGAATACACAGAAGTG  |
| ALDH1A3-c.1477G_reverse | CACTTCTGTGTATTTCGGCCAAAG <u><b>G</b></u> GATTTCACCTAGTTCTCTGCCATTTT |
| ALDH1A3-c.620C_forward  | CATGGTCCTGAAGCCTGCGG <u><b>C</b></u> GCAGACACCTCTCACCGCCCTTT        |
| ALDH1A3-c.620G_reverse  | AGGGCGGTGAGAGGTGTCTGC <u><b>G</b></u> CCGCAGGCTTCAGGACCATGGT        |

**Table S3. Primers Used for Site-Directed Mutagenesis of pCMV6-Entry-*ALDH1A3* Vector**

The mutant nucleotides appear in bold underlined.

| mRNA    | Forward primer (5'-3')              | Reverse primer (5'-3')         |
|---------|-------------------------------------|--------------------------------|
| GFP     | GFP-F_TCCAGCAGGACCATGTGATC          | (GFP-R)_GTCCGCCCTGAGCAAAGA     |
| ALDH1A3 | ALDH1A3-ex12.13F_TGGCAGAGAACTAGGTGA | (c-Myc-R)_GCCAGATCCTCTTCTGAGAT |

**Table S4. RT-qPCR Primers Used to Assess *ALDH1A3* and *GFP* Expression in Transiently Transfected HEK293 Cells**

The use of a primer located in the c-Myc tag with the *ALDH1A3*-ex12.13F allowed specific amplification of the *ALDH1A3* mRNA encoded by the plasmids.
